# Supplementary material
Source: PubMed Central journal article supplement (PMC3505679)
Supplement: NIHMS413389-supplement-1_si_001.pdf [file NIHMS413389-supplement-1_si_001.pdf]

# SUPPORTING INFORMATION

for

## Experimental and Computational Studies Reveal an Alternative Supramolecular Structure for Fmoc- dipeptide Self-assembly

*Xiaojia Mu<sup>‡</sup>, Kevin M. Eckes<sup>‡</sup>, Mary M. Nguyen, Laura J. Suggs\*, Pengyu Ren\**

Department of Biomedical Engineering, The University of Texas at Austin, 107 W Dean Keeton  
St., Stop C0800, Austin, TX 78712

\*Address correspondence to [pren@mail.utexas.edu](mailto:pren@mail.utexas.edu) or [Laura.Suggs@engr.utexas.edu](mailto:Laura.Suggs@engr.utexas.edu)

<sup>‡</sup>These authors contributed equally to this work.

## **Table of contents:**

- (1) A preliminary 300ns simulation of Fmoc-AA fibril
- (2) Analysis of GdL hydrolysis by Circular Dichroism
- (3) Detailed information of models
- (4) Quantum Mechanical Characterization of Fmoc group
- (5) PDB and Topology files for GROMACS 4.5.4 OPLS-AA force field

### **(1) A preliminary 300 ns simulation of Fmoc-AA fibril**

A fibril proposed by Smith *et al.*<sup>1</sup> was used as the starting structure for our Fmoc-AA self-assembly preliminary simulation. However, the center hollow was not maintained and the tube shrunk into a more compact aggregate after 300 ns simulation, as shown in Figure S1.

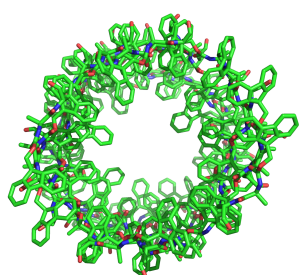

(A) Starting structure

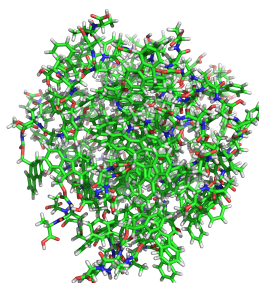

(B) After 300 ns simulation

(hydrogens are not shown)

**Figure S1.** "Top down" views of Fmoc-AA fibril structure before and after preliminary simulation.

## (2) Analysis of GdL hydrolysis by Circular Dichroism

To slow down the process of gelation so that time course measurements of gels could be made easily using circular dichroism, we acidified solutions of Fmoc-AA with 1 eq NaOH using ~2.5 eq glucono- $\delta$ -lactone (GdL), after Adams et al.<sup>2</sup> GdL is a lactone ring that hydrolyzes in solution to yield gluconic acid, which then acidifies the solution. To understand what extent the hydrolysis of GdL contributed to the overall increase in dichroism during the gelation process, we took CD spectra of a GdL solution. A hypothetical concentration of 5 mg/ml Fmoc-AA was used to calculate the total solution volume (3 mL), the volume of 1 eq NaOH (78.5  $\mu$ L), and the mass of ~2.5 eq GdL (16.2 mg). The NaOH was added to DI water, and a spectrum was obtained. Then the GdL was added, and the solution was vortexed and a small amount placed in

a cylindrical quartz cuvette with a path length of 0.1 mm. Spectra were taken every 10 minutes, as shown in Figure S2 below.

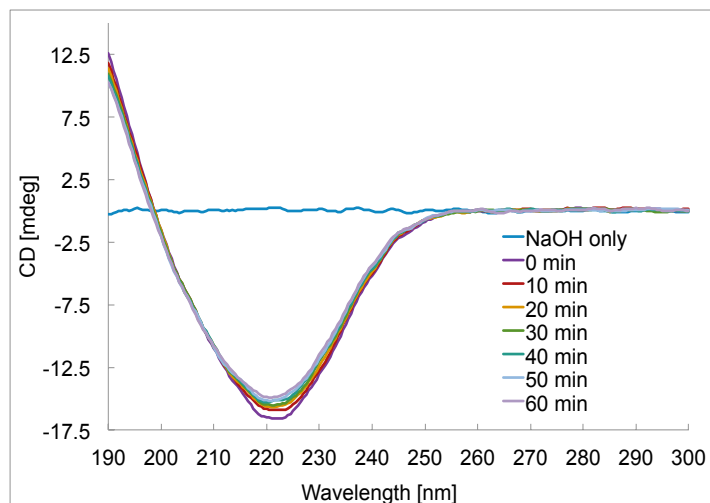

**Figure S2.** Time course CD spectra of glucono- $\delta$ -lactone. Note that peak intensity decreases over time as hydrolysis proceeds.

Interestingly, the magnitude of dichroism decreases slightly over time due to hydrolysis of GdL. Therefore, the increase in dichroism seen in Fmoc-AA solutions acidified with GdL must be due to the self-assembly process and not the hydrolysis of GdL to gluconic acid.

## (2) Detailed information of models

In Table S1 below, geometry information and simulation conditions for each model have been provided.

**Table S1.** Detailed information of models.

| system  | Number of molecules | Box size (nm)  | Water molecules | Final fibril size (nm) | Simulation time (ns) |
|---------|---------------------|----------------|-----------------|------------------------|----------------------|
| Cubic 4 | 80 (20 layers)      | 13×13×3        | 71,801          | 3×3×7                  | 160                  |
| Cubic 5 | 100 (20 layers)     | 13.3×13.3×13.3 | 77,377          | 3×3×7.3                | 160                  |
| Cubic 6 | 120 (20 layers)     | 13.2×13.2×13.2 | 71,584          | 3×3×7.5                | 160                  |
| 400 ns  | 120 (30 layers)     | 7×7×17.2       | 25,793          | 3×3×10                 | 400                  |
| SA      | 60 (15 layers)      | 6×6×11         | 11,966          | ----                   | 40                   |
| REMD    | 60 (15 layers)      | 6×6×11         | 11,966          | ----                   | 100×120              |

Temperatures used for REMD (K)

|        |        |        |        |        |        |        |        |        |        |
|--------|--------|--------|--------|--------|--------|--------|--------|--------|--------|
| 280.00 | 281.65 | 283.32 | 285.00 | 286.70 | 288.42 | 290.16 | 291.91 | 293.68 | 295.47 |
| 297.28 | 299.11 | 300.95 | 302.81 | 304.69 | 306.58 | 308.50 | 310.43 | 312.37 | 314.34 |
| 316.32 | 318.33 | 320.34 | 322.38 | 324.44 | 326.51 | 328.60 | 330.70 | 332.83 | 334.97 |
| 337.13 | 339.31 | 341.50 | 343.72 | 345.95 | 348.20 | 350.46 | 352.75 | 355.05 | 357.37 |
| 359.70 | 362.06 | 364.43 | 366.82 | 369.22 | 371.65 | 374.09 | 376.55 | 379.03 | 381.52 |
| 384.04 | 386.57 | 389.11 | 391.68 | 394.26 | 396.86 | 399.48 | 402.12 | 404.77 | 407.44 |
| 410.13 | 412.84 | 415.56 | 418.31 | 421.07 | 423.84 | 426.64 | 429.45 | 432.28 | 435.13 |
| 437.99 | 440.88 | 443.78 | 446.70 | 449.63 | 452.59 | 455.56 | 458.55 | 461.55 | 464.58 |
| 467.62 | 470.68 | 473.75 | 476.85 | 479.96 | 483.09 | 486.24 | 489.40 | 492.59 | 495.79 |
| 499.01 | 502.24 | 505.49 | 508.77 | 512.05 | 515.36 | 518.68 | 522.03 | 525.38 | 528.76 |
| 532.16 | 535.57 | 539.00 | 542.44 | 545.91 | 549.39 | 552.89 | 556.41 | 559.95 | 563.50 |
| 567.07 | 570.66 | 574.26 | 577.89 | 581.53 | 585.19 | 588.86 | 592.56 | 596.27 | 600.00 |

### (3) Quantum Mechanical Characterization of Fmoc group

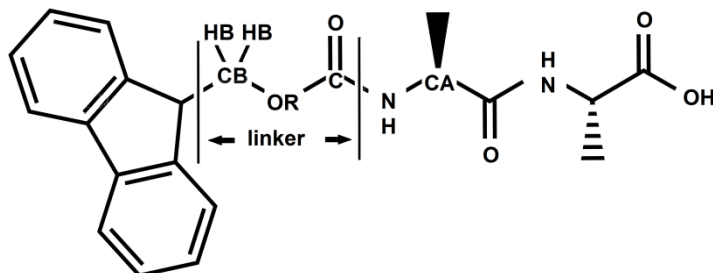

**Figure S2.** Chemical formula of the Fmoc-AA in MD simulations.

The parameters of the “linker” part and on Fmoc-AA (shown in Figure S2) originally were not included in GROMACS OPLS-AA force field or any available force fields. Therefore, we performed *ab initio* quantum mechanical (QM) calculations for the “linker” using the Gaussian 03 and 09 packages.<sup>3,4</sup> The partial charges for new atom types were derived and fitted according to the electrostatic potential (ESP) from QM single point calculations at the HF/6-31G\* level. For each missing torsional angle, we scanned the torsion from  $-180^\circ$  to  $180^\circ$  in  $30^\circ$  increments while constraining other angles; by comparing with our QM calculations, the parameters of missing torsional angles were obtained. The derived OPLS-AA/L<sup>5-7</sup> partial charges and torsional parameters for Fmoc group are summarized in Tables S2 and S3. Other parameters for the Fmoc-AA were transferred from OPLS-AA, OPLS-AA/L and MM3<sup>8</sup> force fields and are provided in part 3.

**Table S2.** Atomic Partial Charges

| atom | charge (electron) |
|------|-------------------|
| CB   | 0.23              |
| OR   | -0.36             |
| C    | 0.80              |
| O    | -0.68             |
| HB   | 0.002             |

**Table S3.** Parameters for Ryckaert-Bellemans torsional potential (kJ mol<sup>-1</sup>)

| torsion angle | $C_0$   | $C_1$    | $C_2$  | $C_3$ | $C_4$ | $C_5$ |
|---------------|---------|----------|--------|-------|-------|-------|
| CB-OR-C-O     | 26.48   | 0        | -26.48 | 0     | 0     | 0     |
| CB-OR-C-N     | 5.68    | 1.09     | -6.77  | 0     | 0     | 0     |
| O-C-N-H       | 20.50   | 0        | -20.50 | 0     | 0     | 0     |
| O-C-N-CA      | 25.48   | 0        | -25.48 | 0     | 0     | 0     |
| OR-C-N-H      | -4.65   | -6.76    | 2.40   | 9.01  | 0     | 0     |
| OR-C-N-CA     | 31.77   | -5.27    | -17.60 | -8.91 | 0     | 0     |
| HB-CB-OR-C    | 0.62760 | -0.62760 | 0      | 0     | 0     | 0     |
| CG-CB-OR-C    | 0       | 0        | 0      | 0     | 0     | 0     |

GROMACS uses the Ryckaert-Bellemans potential, which is given by:  $V_{rb}(\phi_{ijkl}) = \sum_{n=0}^5 C_n (\cos(\psi))^n$ .

**(5) Topology files for GROMACS 4.5.4 OPLS-AA force field**

To run an example of our simulation, readers may download files of our final Cubic 5 fibril structure (“cubic5.pdb”) and our topology package for GROMACS 4.5.4 (FMOC\_topology\_files\_for\_GROMACS\_OPLSAA). In order to implement the topology files, readers should name the Fmoc group according to our \*.pdb, and paste our topology files to the ends of relevant GROMACS 4.5.4 OPLS-AA files respectively.

## References

- (1) Smith, A. M.; Williams, R. J.; Tang, C.; Coppo, P.; Collins, R. F.; Turner, M. L.; Saiani, A.; Ulijn, R. V. *Advanced Materials* 2008, 20, 37.
- (2) Adams, D. J.; Butler, M. F.; Frith, W. J.; Kirkland, M.; Mullen, L.; Sanderson, P. *Soft Matter* 2009, 5, 1856.
- (3) Frisch, M. J.; Trucks, G. W.; Schlegel, H. B.; Scuseria, G. E.; Robb, M. A.; Cheeseman, J. R.; Montgomery, J. A.; Vreven, T.; Kudin, K. N.; Burant, J. C.; Millam, J. M.; Iyengar, S. S.; Tomasi, J.; Barone, V.; Mennucci, B.; Cossi, M.; Scalmani, G.; Rega, N.; Petersson, G. A.; Nakatsuji, H.; Hada, M.; Ehara, M.; Toyota, K.; Fukuda, R.; Hasegawa, J.; Ishida, M.; Nakajima, T.; Honda, Y.; Kitao, O.; Nakai, H.; Klene, M.; Li, X.; Knox, J. E.; Hratchian, H. P.; Cross, J. B.; Bakken, V.; Adamo, C.; Jaramillo, J.; Gomperts, R.; Stratmann, R. E.; Yazyev, O.; Austin, A. J.; Cammi, R.; Pomelli, C.; Ochterski, J. W.; Ayala, P. Y.; Morokuma, K.; Voth, G. A.; Salvador, P.; Dannenberg, J. J.; Zakrzewski, V. G.; Dapprich, S.; Daniels, A. D.; Strain, M. C.; Farkas, O.; Malick, D. K.; Rabuck, A. D.; Raghavachari, K.; Foresman, J. B.; Ortiz, J. V.; Cui, Q.; Baboul, A. G.; Clifford, S.; Cioslowski, J.; Stefanov, B. B.; Liu, G.; Liashenko, A.; Piskorz, P.; Komaromi, I.; Martin, R. L.; Fox, D. J.; Keith, T.; Laham, A.; Peng, C. Y.; Nanayakkara, A.; Challacombe, M.; Gill, P. M. W.; Johnson, B.; Chen, W.; Wong, M. W.; Gonzalez, C.; Pople, J. A. 2003.
- (4) Frisch, M. J.; Trucks, G. W.; Schlegel, H. B.; Scuseria, G. E.; Robb, M. A.; Cheeseman, J. R.; Scalmani, G.; Barone, V.; Mennucci, B.; Petersson, G. A.; Nakatsuji, H.; Caricato, M.; Li, X.; Hratchian, H. P.; Izmaylov, A. F.; Bloino, J.; Zheng, G.; Sonnenberg, J. L.; Hada, M.; Ehara, M.; Toyota, K.; Fukuda, R.; Hasegawa, J.; Ishida, M.; Nakajima, T.; Honda, Y.; Kitao, O.; Nakai, H.; Vreven, T.; Montgomery, J. A.; Peralta, J. E.; Ogliaro, F.; Bearpark, M.; Heyd, J. J.; Brothers, E.; Kudin, K. N.; Staroverov, V. N.; Kobayashi, R.; Normand, J.; Raghavachari, K.; Rendell, A.; Burant, J. C.; Iyengar, S. S.; Tomasi, J.; Cossi, M.; Rega, N.; Millam, J. M.; Klene, M.; Knox, J. E.; Cross, J. B.; Bakken, V.; Adamo, C.; Jaramillo, J.; Gomperts, R.; Stratmann, R. E.; Yazyev, O.; Austin, A. J.; Cammi, R.; Pomelli, C.; Ochterski, J. W.; Martin, R. L.; Morokuma, K.; Zakrzewski, V. G.; Voth, G.



A.; Salvador, P.; Dannenberg, J. J.; Dapprich, S.; Daniels, A. D.; Farkas; Foresman, J. B.; Ortiz, J. V.; Cioslowski, J.; Fox, D. J. 2009.

(5) Jorgensen, W. L.; Maxwell, D. S.; Tirado-Rives, J. J. *Am. Chem. Soc.* 1996, 118, 11225.

(6) Jorgensen, W. L.; Tirado-Rives, J. *P Natl Acad Sci USA* 2005, 102, 6665.

(7) Zhang, J.; King, M.; Suggs, L.; Ren, P. *Biomacromolecules* 2007, 8, 3015.

(8) Allinger, N. L.; Yuh, Y. H.; Lii, J. H. *J. Am. Chem. Soc.* 1989, 111, 8551.
